# Supplementary material for: Didehydrophenylalanine, an abundant modification in the beta subunit of plant polygalacturonases
Source: PubMed Central journal article supplement (PMC5313189; doi:10.1371/journal.pone.0171990), 2017-02-16
Supplement: pone.0171990.s001.pdf [file pone.0171990.s001.pdf]

**S1 File: Figure A.** Data indicating that the identification of an unmodified phenylalanine in the peptide VNFVNYGQSFNPGSETFTGYGK is erroneous.

Dataset PRD000044 file 3337: calculated and matched fragment ions of the peptide VNFVNYGQSFNPGSETFTGYGK as identified by MASCOT using the selected doubly charged precursor of 1206.69. This resulted in the identification of the peptide with only the phenylalanine at position 17 identified as being modified. The fragments that were matched are indicated in bold red.

| #  | b               | b <sup>++</sup> | b <sup>*</sup>  | b <sup>0</sup>  | b <sup>0++</sup> | Seq. | y               | y <sup>++</sup> | y <sup>*++</sup> | y <sup>0</sup>  | y <sup>0++</sup> | #  |
|----|-----------------|-----------------|-----------------|-----------------|------------------|------|-----------------|-----------------|------------------|-----------------|------------------|----|
| 1  | 100.0757        | 50.5415         |                 |                 |                  | V    |                 |                 |                  |                 |                  | 22 |
| 2  | 214.1186        | 107.5629        | 197.0921        |                 |                  | N    | 2312.026        | 1156.516        | 1148.003         | 2294.015        | 1147.511         | 21 |
| 3  | <b>361.187</b>  | 181.0972        | 344.1605        |                 |                  | F    | 2197.983        | <b>1099.495</b> | <b>1090.982</b>  | 2179.972        | <b>1090.49</b>   | 20 |
| 4  | <b>460.2554</b> | 230.6314        | 443.2289        |                 |                  | V    | 2050.914        | 1025.961        | <b>1017.447</b>  | 2032.904        | 1016.955         | 19 |
| 5  | 574.2984        | 287.6528        | 557.2718        |                 |                  | N    | <b>1951.846</b> | 976.4265        | 967.9132         | <b>1933.835</b> | 967.4212         | 18 |
| 6  | <b>737.3617</b> | 369.1845        | 720.3352        |                 |                  | Y    | <b>1837.803</b> | 919.405         | 910.8917         | <b>1819.792</b> | 910.3997         | 17 |
| 7  | 794.3832        | 397.6952        | 777.3566        |                 |                  | G    | <b>1674.739</b> | 837.8734        | 829.3601         | 1656.729        | 828.8681         | 16 |
| 8  | <b>922.4417</b> | 461.7245        | 905.4152        |                 |                  | Q    | <b>1617.718</b> | 809.3626        | 800.8494         | 1599.707        | 800.3573         | 15 |
| 9  | <b>1009.474</b> | 505.2405        | 992.4472        | 991.4632        | 496.2352         | S    | <b>1489.659</b> | 745.3333        | <b>736.8201</b>  | <b>1471.649</b> | <b>736.3281</b>  | 14 |
| 10 | 1156.542        | 578.7747        | 1139.516        | 1138.532        | 569.7694         | F    | <b>1402.627</b> | 701.8173        | 693.3041         | <b>1384.617</b> | 692.812          | 13 |
| 11 | <b>1270.585</b> | 635.7962        | 1253.559        | <b>1252.575</b> | 626.7909         | N    | <b>1255.559</b> | 628.2831        | 619.7698         | <b>1237.548</b> | 619.2778         | 12 |
| 12 | 1367.638        | 684.3226        | 1350.611        | 1349.627        | 675.3173         | P    | <b>1141.516</b> | <b>571.2617</b> | <b>562.7484</b>  | <b>1123.506</b> | <b>562.2564</b>  | 11 |
| 13 | 1424.659        | 712.8333        | 1407.633        | <b>1406.649</b> | 703.828          | G    | <b>1044.463</b> | <b>522.7353</b> | 514.222          | <b>1026.453</b> | 513.73           | 10 |
| 14 | 1511.691        | 756.3493        | 1494.665        | 1493.681        | 747.344          | S    | <b>987.4418</b> | 494.2245        | 485.7113         | 969.4312        | 485.2193         | 9  |
| 15 | <b>1640.734</b> | 820.8706        | <b>1623.707</b> | <b>1622.723</b> | 811.8653         | E    | <b>900.4098</b> | 450.7085        | 442.1953         | <b>882.3992</b> | 441.7032         | 8  |
| 16 | <b>1741.782</b> | 871.3945        | <b>1724.755</b> | <b>1723.771</b> | 862.3892         | T    | <b>771.3672</b> | 386.1872        | 377.674          | <b>753.3566</b> | 377.1819         | 7  |
| 17 | 1886.834        | 943.9208        | <b>1869.808</b> | <b>1868.824</b> | 934.9156         | F    | <b>670.3195</b> | 335.6634        | 327.1501         | <b>652.3089</b> | 326.6581         | 6  |
| 18 | 1987.882        | 994.4447        | 1970.856        | 1969.872        | 985.4394         | T    | <b>525.2667</b> | 263.137         | 254.6237         | <b>507.2562</b> | 254.1317         | 5  |
| 19 | 2044.904        | 1022.955        | 2027.877        | 2026.893        | 1013.95          | G    | <b>424.2191</b> | 212.6132        | 204.0999         |                 |                  | 4  |
| 20 | 2207.967        | 1104.487        | 2190.94         | 2189.956        | 1095.482         | Y    | <b>367.1976</b> | 184.1024        | 175.5892         |                 |                  | 3  |
| 21 | 2264.988        | 1132.998        | 2247.962        | 2246.978        | <b>1123.993</b>  | G    | 204.1343        | 102.5708        | 94.0575          |                 |                  | 2  |
| 22 |                 |                 |                 |                 |                  | K    | 147.1128        | 74.06           | 65.5468          |                 |                  | 1  |

The presence of an unmodified phenylalanine at position 3 is however not in agreement with the details of the MS/MS spectrum.

In the table above the b(8) ion is matched at m/z 922.4, however a peak at m/z 920.5 would be a better match.

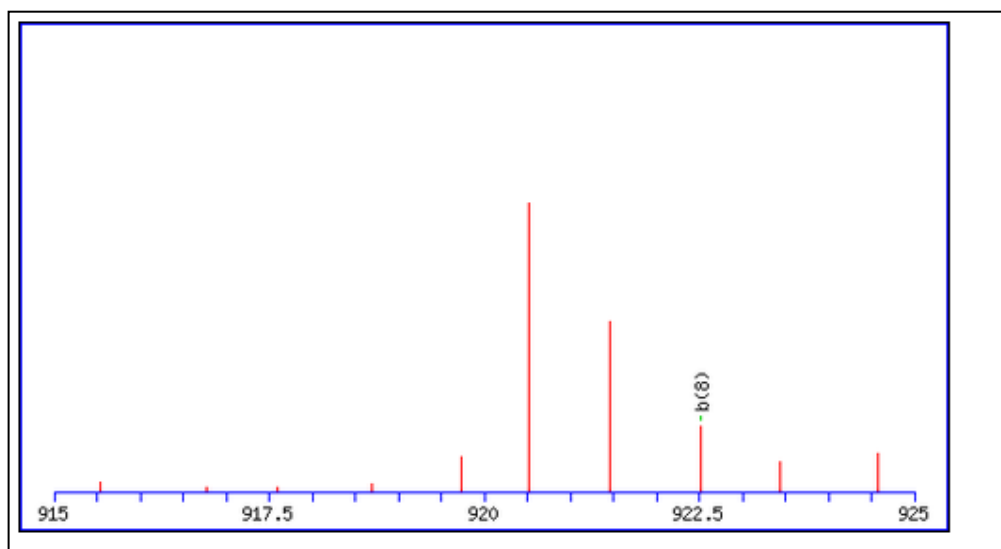

For the b(9) ion matched at 1009.5, a more intense peak is actually observed at 1007.5

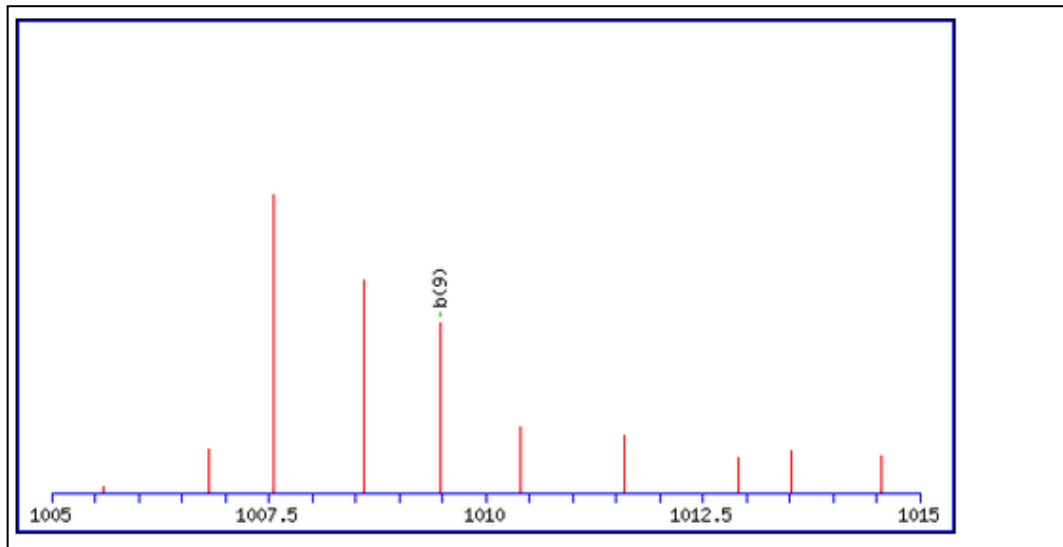

For the b(11) ion matched at 1270.6 a more intense peak is observed at 1268.5

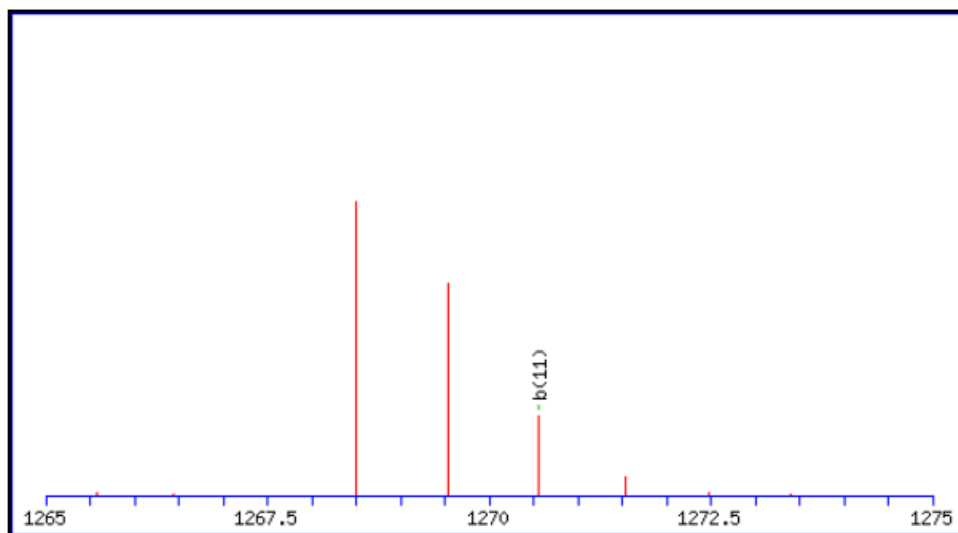

These three details of the MS/MS spectrum and the observation that the isotopic cluster of these fragments do not show any deviations from what can be expected indicate that contrary to the match-table the phenylalanine at position three (VNFVNYGQSFNPGSETFTGYGK) is indeed modified and shows a mass loss of two Dalton.

Using the  $\gamma$ -ion series, the same can be concluded for the phenylalanine at position 17

The  $\gamma(5)$  ion does not contain a phenylalanine and its mass matched exactly the one found in the above match-table.

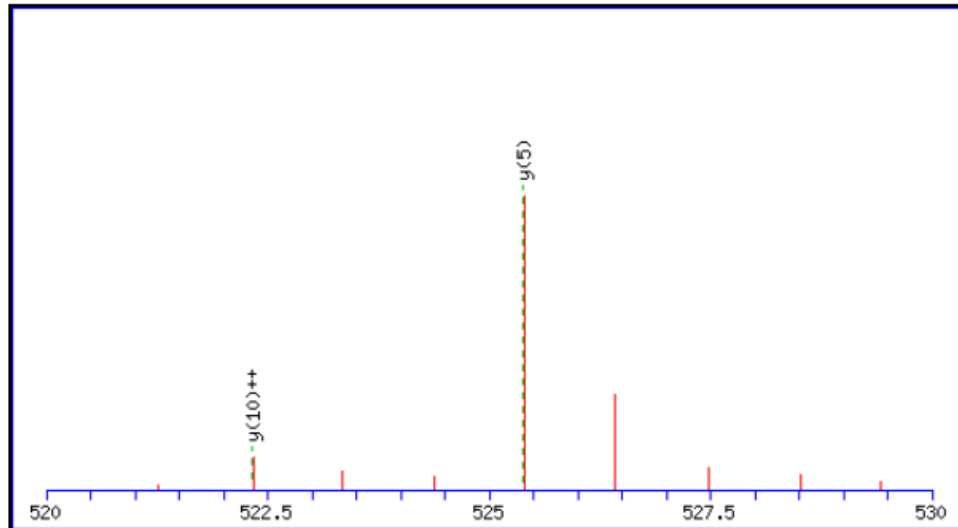

The  $\gamma(6)$  ion contains a phenylalanine, modified based on the database search, and indeed the  $m/z$  of the observed ion is in agreement with the predicted  $\gamma(6)$  for a modified phenylalanine.

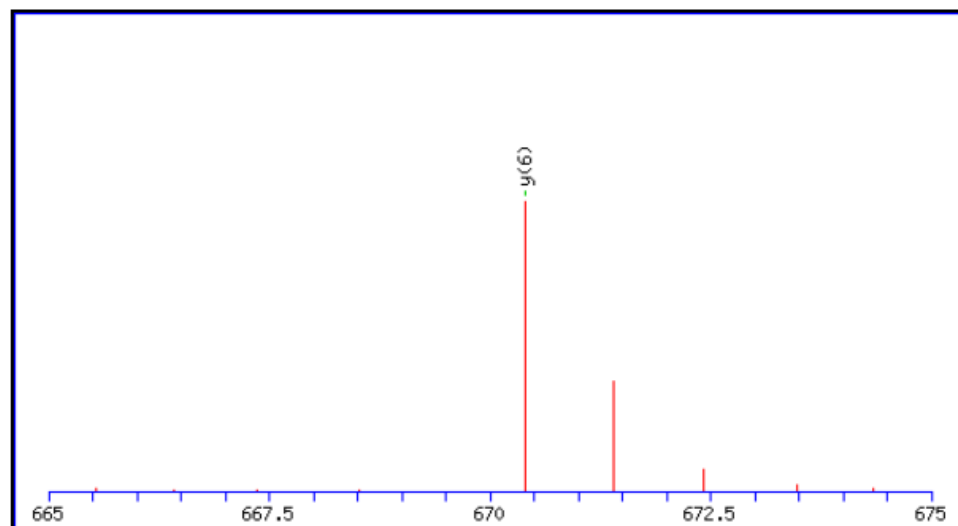

The  $\gamma(7)$  ion is again in agreement with the predicted  $m/z$ .

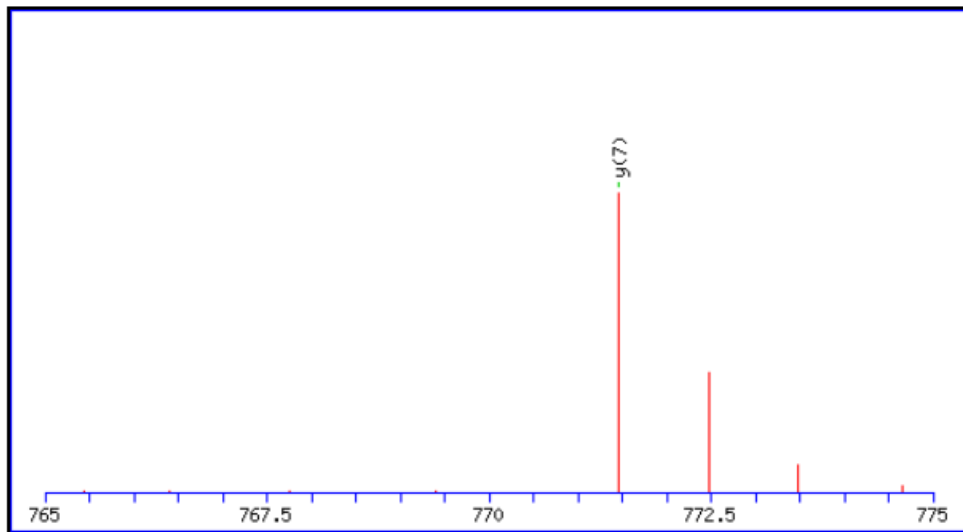

For larger  $\gamma$ -ions this match stays good, as for instance for the  $\gamma(16)$  ion.

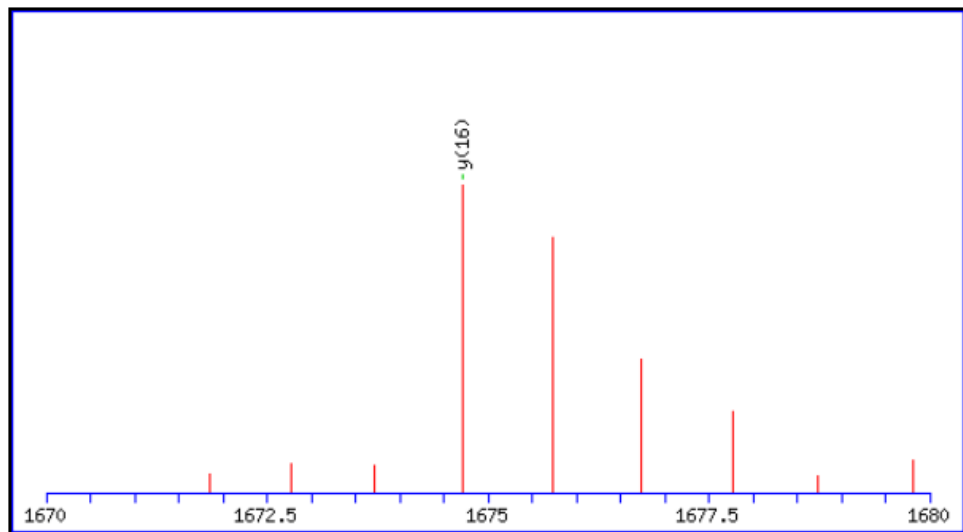

The same is the case for the entire  $\gamma$ -ion series. Since there is furthermore no significant shift in the isotopic distribution (in casus an unexpected increase of the peak at the monoisotopic mass plus 2), based on these spectra it must be concluded that the phenylalanine at position 17 (VNFVNYGQSFNPGSET**F**TGYGK) is quantitatively converted into didehydrophenylalanine.

The peak list of the corresponding MS/MS spectrum was isolated from the result files and searched individually. The precursor mass used in the database search was calculated based on the summation of corresponding  $\gamma$ - and  $b$ -ions. For the dataset 3337 this results in a corrected precursor  $m/z$  of 1205.69 when doubly charged. The use of this corrected precursor mass resulted in an

increase of the score of the search from 63 to 77 (as given in table 1 in the manuscript) for the peptide with both phenylalanines modified, the match table for the latter result is given below.

| #         | b               | b <sup>++</sup> | b*              | b <sup>0</sup>  | b <sup>0++</sup> | Seq.     | y               | y <sup>++</sup> | y <sup>*++</sup> | y <sup>0</sup>  | y <sup>0++</sup> | #         |
|-----------|-----------------|-----------------|-----------------|-----------------|------------------|----------|-----------------|-----------------|------------------|-----------------|------------------|-----------|
| <b>1</b>  | 100.0757        | 50.5415         |                 |                 |                  | <b>V</b> |                 |                 |                  |                 |                  | <b>22</b> |
| <b>2</b>  | 214.1186        | 107.5629        | 197.0921        |                 |                  | <b>N</b> | 2310.01         | 1155.509        | 1146.995         | 2291.999        | 1146.503         | <b>21</b> |
| <b>3</b>  | 359.1714        | 180.0893        | 342.1448        |                 |                  | <b>F</b> | 2195.967        | <b>1098.487</b> | <b>1089.974</b>  | 2177.956        | <b>1089.482</b>  | <b>20</b> |
| <b>4</b>  | 458.2398        | 229.6235        | 441.2132        |                 |                  | <b>V</b> | 2050.914        | <b>1025.961</b> | <b>1017.447</b>  | 2032.904        | <b>1016.955</b>  | <b>19</b> |
| <b>5</b>  | 572.2827        | 286.645         | 555.2562        |                 |                  | <b>N</b> | <b>1951.846</b> | 976.4265        | 967.9132         | 1933.835        | 967.4212         | <b>18</b> |
| <b>6</b>  | 735.3461        | 368.1767        | 718.3195        |                 |                  | <b>Y</b> | <b>1837.803</b> | 919.405         | 910.8917         | 1819.792        | 910.3997         | <b>17</b> |
| <b>7</b>  | 792.3675        | 396.6874        | 775.341         |                 |                  | <b>G</b> | 1674.739        | <b>837.8734</b> | 829.3601         | 1656.729        | 828.8681         | <b>16</b> |
| <b>8</b>  | <b>920.4261</b> | 460.7167        | <b>903.3995</b> |                 |                  | <b>Q</b> | 1617.718        | <b>809.3626</b> | 800.8494         | 1599.707        | 800.3573         | <b>15</b> |
| <b>9</b>  | 1007.458        | 504.2327        | 990.4316        | 989.4476        | 495.2274         | <b>S</b> | <b>1489.659</b> | 745.3333        | <b>736.8201</b>  | <b>1471.649</b> | <b>736.3281</b>  | <b>14</b> |
| <b>10</b> | 1154.527        | 577.7669        | 1137.5          | 1136.516        | 568.7616         | <b>F</b> | <b>1402.627</b> | 701.8173        | 693.3041         | 1384.617        | 692.812          | <b>13</b> |
| <b>11</b> | <b>1268.57</b>  | 634.7884        | <b>1251.543</b> | 1250.559        | <b>625.7831</b>  | <b>N</b> | <b>1255.559</b> | <b>628.2831</b> | 619.7698         | 1237.548        | 619.2778         | <b>12</b> |
| <b>12</b> | 1365.622        | 683.3148        | 1348.596        | 1347.612        | 674.3095         | <b>P</b> | <b>1141.516</b> | 571.2617        | 562.7484         | <b>1123.506</b> | 562.2564         | <b>11</b> |
| <b>13</b> | 1422.644        | 711.8255        | 1405.617        | 1404.633        | 702.8202         | <b>G</b> | 1044.463        | <b>522.7353</b> | 514.222          | <b>1026.453</b> | 513.73           | <b>10</b> |
| <b>14</b> | 1509.676        | 755.3415        | 1492.649        | 1491.665        | 746.3362         | <b>S</b> | <b>987.4418</b> | 494.2245        | 485.7113         | 969.4312        | 485.2193         | <b>9</b>  |
| <b>15</b> | <b>1638.718</b> | 819.8628        | <b>1621.692</b> | <b>1620.708</b> | <b>810.8575</b>  | <b>E</b> | <b>900.4098</b> | 450.7085        | 442.1953         | 882.3992        | 441.7032         | <b>8</b>  |
| <b>16</b> | <b>1739.766</b> | 870.3866        | <b>1722.739</b> | <b>1721.755</b> | 861.3814         | <b>T</b> | <b>771.3672</b> | 386.1872        | 377.674          | <b>753.3566</b> | 377.1819         | <b>7</b>  |
| <b>17</b> | <b>1884.819</b> | 942.913         | 1867.792        | <b>1866.808</b> | 933.9077         | <b>F</b> | <b>670.3195</b> | 335.6634        | 327.1501         | 652.3089        | 326.6581         | <b>6</b>  |
| <b>18</b> | <b>1985.866</b> | 993.4369        | <b>1968.84</b>  | <b>1967.856</b> | 984.4316         | <b>T</b> | <b>525.2667</b> | 263.137         | 254.6237         | 507.2562        | 254.1317         | <b>5</b>  |
| <b>19</b> | 2042.888        | 1021.948        | 2025.861        | 2024.877        | 1012.942         | <b>G</b> | <b>424.2191</b> | 212.6132        | 204.0999         |                 |                  | <b>4</b>  |
| <b>20</b> | 2205.951        | 1103.479        | 2188.925        | 2187.941        | 1094.474         | <b>Y</b> | <b>367.1976</b> | 184.1024        | 175.5892         |                 |                  | <b>3</b>  |
| <b>21</b> | 2262.973        | 1131.99         | 2245.946        | 2244.962        | 1122.985         | <b>G</b> | 204.1343        | 102.5708        | 94.0575          |                 |                  | <b>2</b>  |
| <b>22</b> |                 |                 |                 |                 |                  | <b>K</b> | 147.1128        | 74.06           | 65.5468          |                 |                  | <b>1</b>  |

The most probable reason is a combination of different things. First of all the data was acquired on a mass spectrometer with a relatively low resolution. For higher m/z precursors this may result in the loss of isotopic resolution and thus the selection of a precursor that in mass approaches the average peptide mass and not the monoisotopic. While this in general will pose little problem, in our case the mass shift induced by the conversion of phenylalanine to didehydrophenylalanine is lower than the mass error allowed for the search.

**S1 File: Table A. all the peptides from the beta-subunit of polygalacturonase identified in this study.**

The data from the 4 species wherein the protein and its dehydrated phenylalanine was found are grouped.

Note that when a peptide was found using both MALDI and ESI from internal or external datasets, it is only added once.

The annotation of the alfalfa contigs is linked to the Alfalfa gene index and expression atlas database (<http://plantgrn.noble.org/AGED/>)

Note: The contig 53836 contains two repetitions of beta-polygalacturonase, one homologous to contig 12933 and a second with lower homology

**Alfalfa (in-house generated data and Verdonk et al. *Front Plant Sci* (2012) 3, art.: 279)**

[contig\\_12933](#) the same set of peptides also found in [contig\\_111493](#), [contig\\_22692](#), [contig\\_27771](#), [contig\\_48302](#), [contig\\_51002](#), [contig\\_53836](#)

| Obs     | Exp     | Cal     | Error (ppm) | Score | peptide sequence                                                |
|---------|---------|---------|-------------|-------|-----------------------------------------------------------------|
| 346.69  | 691.37  | 691.37  | 3.29        | 29    | K.NANVFK.S                                                      |
| 378.19  | 754.36  | 754.36  | 0.72        | 33    | K.GADLDHK.V                                                     |
| 509.21  | 1016.41 | 1016.41 | -0.27       | 36    | K.SDFSGYSEK.G + Didehydro (F)                                   |
| 1149.55 | 1148.54 | 1148.54 | 4.74        | 42    | K.HNEFARYSK.I + Didehydro (F)                                   |
| 1285.60 | 1284.60 | 1284.60 | -2.26       | 87    | K.SPGSETFKGYAK.G + Didehydro (F); Oxidation (P)                 |
| 1315.61 | 1314.60 | 1314.61 | -3.41       | 84    | K.GSSAVDAFVSYSK.N + Didehydro (F)                               |
| 1548.74 | 1547.73 | 1547.74 | -2.42       | 97    | K.DSIHAVNGFTQYAK.N + Didehydro (F)                              |
| 1653.75 | 1652.74 | 1652.75 | -2.22       | 75    | K.VDFNNYGLNPDYPK.S + Didehydro (F)                              |
| 1664.84 | 1663.83 | 1663.83 | -1.3        | 102   | K.NLNKPENTFKNYGK.G + Didehydro (F)                              |
| 2314.01 | 2313.01 | 2313.01 | -0.4        | 151   | K.SDFSGYSEKGGSSAVDAFVSYSK.N + 2 Didehydro (F)                   |
| 2920.35 | 2919.34 | 2919.34 | 1.91        | 45    | K.VDFNNYGLNPDYPKSPGSETFKGYAK.G + 2 Didehydro (F); Oxidation (P) |
| 2987.38 | 2986.37 | 2986.36 | 2.89        | 109   | K.NANVFKSDFSGYSEKGGSSAVDAFVSYSK.N + 2 Didehydro (F)             |
| 1728.83 | 1727.83 | 1727.83 | 0           | 77    | L.NKPENTFKNYGKGSF.A + Didehydro (F)                             |

the same set of peptides also found in [contig\\_111493](#), [contig\\_22692](#), [contig\\_27771](#), [contig\\_48302](#), [contig\\_51002](#)

| Obs     | Exp     | Cal     | Error (ppm) | Score | peptide sequence                            |
|---------|---------|---------|-------------|-------|---------------------------------------------|
| 2161.92 | 2160.91 | 2160.91 | 1.08        | 182   | R.DGAGSGDSDSFTSYGESSQLGVK.V + Didehydro (F) |

the same set of peptides also found in [contig\\_22692](#), [contig\\_27771](#), [contig\\_48302](#)

| Obs     | Exp     | Cal     | Error (ppm) | Score | peptide sequence                                           |
|---------|---------|---------|-------------|-------|------------------------------------------------------------|
| 1516.72 | 1515.71 | 1515.71 | 0.39        | 90    | K.GSFAAQEKFTNYR.D + Didehydro (F)                          |
| 2075.91 | 2074.90 | 2074.90 | 0.8         | 27    | K.GSFAAQEKFTNYRDGAGSGD + Didehydro (F)                     |
| 3659.69 | 3658.68 | 3658.61 | 19.5        | 93    | K.GSFAAQEKFTNYRDGAGSGDSDSFTSYGESSQLGVK.V + 2 Didehydro (F) |
| 3084.34 | 3083.33 | 3083.30 | 10.4        | 67    | F.AAQEKFTNYRDGAGSGDSDSFTSYGESSQL.G + 2 Didehydro (F)       |

[contig\\_51001](#)

| Obs    | Exp     | Cal     | Error (ppm) | Score | peptide sequence                    |
|--------|---------|---------|-------------|-------|-------------------------------------|
| 779.35 | 1556.68 | 1556.67 | 0.69        | 63    | R.DQANVGADSFSSYAK.D + Didehydro (F) |
| 805.84 | 1609.67 | 1609.66 | 2.74        | 79    | K.DSTGGTHVDFDNYGK.S + Didehydro (F) |

|        |         |         |       |    |                                                    |
|--------|---------|---------|-------|----|----------------------------------------------------|
| 818.35 | 2452.02 | 2452.02 | -0.52 | 53 | R.QQTFTSYSEAGNAGDQSFSGNYGK.D + 2 Didehydro (F)     |
| 988.80 | 2963.36 | 2963.37 | -2.06 | 46 | R.GSLGAVEKFSNYRDQANVGADSFSSYAK.D + 2 Didehydro (F) |

contig\_53836

| Obs    | Exp     | Cal     | Error (ppm) | Score | peptide sequence                                      |
|--------|---------|---------|-------------|-------|-------------------------------------------------------|
| 471.24 | 940.47  | 940.47  | -0.18       | 33    | K.GISFAGYTK.K + Didehydro (F)                         |
| 535.29 | 1068.56 | 1068.56 | -2.66       | 36    | K.KGISFAGYTK.K + Didehydro (F)                        |
| 713.36 | 1424.71 | 1424.70 | 1.1         | 38    | R.GSLGAVEKFSNYR.D + Didehydro (F)                     |
| 516.91 | 1547.69 | 1547.69 | 3.12        | 38    | K.SFNEGTDSFKGYAK.G + Didehydro (F)                    |
| 779.34 | 1556.67 | 1556.67 | -0.42       | 79    | R.DQANVGADSFSSYAK.D + Didehydro (F)                   |
| 805.84 | 1609.67 | 1609.66 | 2.74        | 79    | K.DSTGGTHVDFDNYGK.S + Didehydro (F)                   |
| 689.02 | 2064.04 | 2064.04 | 2.43        | 53    | K.DTNVPLRFTTYSVGVAGR.Q + Didehydro (F)                |
| 694.35 | 2080.03 | 2080.03 | -1.06       | 56    | K.DTNVPLRFTTYSVGVAGR.Q + Didehydro (F); Oxidation (P) |
| 818.35 | 2452.02 | 2452.02 | -0.12       | 44    | R.QQTFTSYSEAGNAGDQSFSGNYGK.D + 2 Didehydro (F)        |
| 988.80 | 2963.37 | 2963.37 | -0.36       | 41    | R.GSLGAVEKFSNYRDQANVGADSFSSYAK.D + 2 Didehydro (F)    |

the same set of peptides also found in contig\_111493

| Obs     | Exp     | Cal     | Error (ppm) | Score | peptide sequence                  |
|---------|---------|---------|-------------|-------|-----------------------------------|
| 1532.71 | 1531.70 | 1531.71 | -0.54       | 72    | K.GSFASQEKFTNYR.D + Didehydro (F) |

contig\_93293

the same set of peptides also found in contig\_101380

| Obs    | Exp     | Cal     | Error (ppm) | Score | peptide sequence                            |
|--------|---------|---------|-------------|-------|---------------------------------------------|
| 456.22 | 910.42  | 910.42  | 0.18        | 37    | K.IGFDNYGK.S + Didehydro (F)                |
| 318.18 | 951.52  | 951.52  | 1.88        | 45    | K.VGFKGYGVK.N + Didehydro (F)               |
| 514.74 | 1027.46 | 1027.46 | -2.93       | 28    | K.NDFKEYSK.E + Didehydro (F)                |
| 672.81 | 1343.60 | 1343.60 | -1.71       | 87    | K.SNVGADSFTSYAK.T + Didehydro (F)           |
| 783.35 | 1564.68 | 1564.67 | 5.44        | 54    | K.SFNEGTDTFTSYAK.T + Didehydro (F)          |
| 843.36 | 2527.06 | 2527.05 | 3.76        | 39    | R.TQSFNSYTENGSQGSFTSYGK.N + 2 Didehydro (F) |

contig\_65436

| Obs     | Exp     | Cal     | Error (ppm) | Score | peptide sequence                            |
|---------|---------|---------|-------------|-------|---------------------------------------------|
| 434.24  | 866.47  | 866.47  | 1.32        | 30    | R.AFKVYNK.N + Didehydro (F)                 |
| 615.28  | 1228.54 | 1228.54 | 0.05        | 44    | K.SDSNFAVYSNK.K + Didehydro (F)             |
| 728.82  | 1455.63 | 1455.63 | -0.18       | 59    | R.ANVGDDSFQSYGAK.S + Didehydro (F)          |
| 1100.00 | 2197.99 | 2197.99 | -2.17       | 103   | K.SSFKAYGTGSVSGSDTFVSYR.N + 2 Didehydro (F) |

contig\_94188

| Obs    | Exp     | Cal     | Error (ppm) | Score | peptide sequence                               |
|--------|---------|---------|-------------|-------|------------------------------------------------|
| 822.68 | 2465.02 | 2465.02 | 0.45        | 30    | R.QQTFNSYSEAGNAGDQSFSGNYGK.D + 2 Didehydro (F) |

***Cannabis sativa***

6D1\_S2\_L001\_R1\_001\_(paired)\_contig\_648 Mass: 91038 Score: 96 Expect: 0.00037 Matches: 1 Frame: 2  
ired)\_contig\_648 polygalacturonase isoenzyme 1 beta subunit homolog

| Obs     | Exp     | Cal     | Error (ppm) | Score | peptide sequence                                 |
|---------|---------|---------|-------------|-------|--------------------------------------------------|
| 1548.69 | 1547.69 | 1547.69 | -2.67       | 101   | K.SFNEGTDKFTGYGK.G + Didehydro (F)               |
| 1583.71 | 1582.70 | 1582.70 | -0.28       | 77    | K.SSNAEQINFNNYK.S + Didehydro (F)                |
| 3000.38 | 2999.38 | 2999.39 | -5.18       | 29    | R.QGGSDQFKNYSPGENIPVDSFRRYSR.D + 2 Didehydro (F) |

***Arabidopsis thaliana* (Pride: PRD000044; Baerenfaller et al. Science (2008) 320, 938-941)**

gi|1762584 polygalacturonase isoenzyme 1 beta subunit homolog [Arabidopsis thaliana]

|                              | Obs     | Exp     | Cal     | Error (Da) | Score | peptide sequence                             |
|------------------------------|---------|---------|---------|------------|-------|----------------------------------------------|
| <a href="#">dataset 3322</a> | 1205.80 | 2409.59 | 2408.07 | 1.5145     | 70    | K.VNFVNYGQSFNPGSETFTGYGK.G + 2 Didehydro (F) |
| <a href="#">dataset 3335</a> | 1205.01 | 2408.01 | 2408.07 | -0.0655    | 46    | K.VNFVNYGQSFNPGSETFTGYGK.G + 2 Didehydro (F) |
| <a href="#">dataset 3337</a> | 1205.69 | 2409.36 | 2408.07 | 1.2943     | 77    | K.VNFVNYGQSFNPGSETFTGYGK.G + 2 Didehydro (F) |

***Arabidopsis thaliana* (De Vijlder et al. J Chromatography (2015) 974, 48-56 )**

gi|1762584 polygalacturonase isoenzyme 1 beta subunit homolog [Arabidopsis thaliana]

|                             | Obs    | Exp     | Cal     | Error (ppm) | Score | peptide sequence                  |
|-----------------------------|--------|---------|---------|-------------|-------|-----------------------------------|
| <a href="#">Fraction 10</a> | 679.80 | 1357.58 | 1357.58 | 4.46        | 49    | K.ANVGDDSFSSYAK.D + Didehydro (F) |

***Zea mays* (Walley et al. PNAS (2013) 110, E4808-4817 & Walley et al. Science (2016) 353, 814-818)**

**Dataset: Maize\_endosperm-10-try-150ug-2D29-122109-LTQ3 (22;23)**

gi|195613864 polygalacturonase-1 non-catalytic beta subunit precursor [Zea mays]

| Fraction                        | Obs     | Exp     | Cal     | Error (Da) | Score | peptide sequence                   |
|---------------------------------|---------|---------|---------|------------|-------|------------------------------------|
| <a href="#">20</a>              | 553.59  | 1657.75 | 1657.65 | 0.098      | 40    | R.DDGNVGDDRFTSYAK.G + ΔPhe         |
|                                 | 829.75  | 1657.49 | 1657.65 | -0.16      | 48    | R.DDGNVGDDRFTSYAK.G + ΔPhe         |
| <a href="#">23, 24 &amp; 25</a> | 1117.84 | 2233.67 | 2233.22 | 0.44       | 108   | R.SFASYSQEANHGENGFSGYGK.N + 2 ΔPhe |
|                                 | 745.83  | 2234.47 | 2233.22 | 1.25       | 60    | R.SFASYSQEANHGENGFSGYGK.N + 2 ΔPhe |
| <a href="#">27</a>              | 326.11  | 650.21  | 649.31  | 0.89       | 30    | K.SGVDFK.G + ΔPhe                  |
| <a href="#">28</a>              | 693.23  | 2076.67 | 2076.19 | 0.48       | 46    | FRSYGAGGNAGVDTFKNYR + 2 ΔPhe       |



**Dataset Maize juvenileleaf-1-Try-3mg-MCX-1500ugCeO2-Elu-2d19-030210-LTQ3**

gi|195613864 polygalacturonase-1 non-catalytic beta subunit precursor [Zea mays]

| Fraction | Obs     | Exp     | Cal     | Error (Da) | Score | peptide sequence                    |
|----------|---------|---------|---------|------------|-------|-------------------------------------|
| 14       | 554.13  | 1659.28 | 1657.65 | 1.63       | 28    | R.DDGNVGDDRFTSYAK.G + ΔPhe          |
|          | 830.12  | 1658.23 | 1657.65 | 0.58       | 43    | R.DDGNVGDDRFTSYAK.G + ΔPhe          |
| 17 & 18  | 1117.86 | 2233.71 | 2233.22 | 0.48       | 80    | R.SFASYSQEANHGGENGFSGYGK.N + 2 ΔPhe |
